# Supplementary material for: Emissions of NOx from blending of hydrogen and natural gas in space heating boilers
Source: Oxford University Press journal article supplement (doi:10.1525/elementa.2021.00114), 2021-01-01
Supplement: supplemental_material.docx [file supplemental_material.docx]

**Supplemental material**

**Emissions of NOx from blending of hydrogen and natural gas in space heating boilers**

Madeleine L Wright1, Alastair C Lewis2, *

1Department of Chemistry, University of York, Heslington, York YO105DD

2National Centre for Atmospheric Science, University of York, Heslington, York YO105DD

*Corresponding author: [ally.lewis@ncas.ac.uk](mailto:ally.lewis@ncas.ac.uk)

March 16, 2022

**Table of Contents:**

**Figure S1.** Calibration curve to expand experimental data from dataset 13(Table 1).Original experimental data in dataset 13 only contains one datapoint within our considered range of fuel blends of 0-20% hydrogen (Ilbas, Yilmaz, Veziroglu, et al., 2005). The linear relationship between experimental and predicted NOx has been exploited to increase the number of experimental datapoints within our considered range. Datapoints from left to right are for 0, 70 and 100% hydrogen. (Page 2)

**Figure S1.** Calibration curve to expand experimental data from dataset 13 (Table 1). Original experimental data in dataset 13 only contains one datapoint within our considered range of fuel blends of 0-20% hydrogen (Ilbas, Yilmaz, Veziroglu, et al., 2005). The linear relationship between experimental and predicted NOx has been exploited to increase the number of experimental datapoints within our considered range. Datapoints from left to right are for 0, 70 and 100% hydrogen.
